# Supplementary material for: Selection on oxidative phosphorylation and ribosomal structure as a multigenerational response to ocean acidification in the common copepod Pseudocalanus acuspes
Source: PubMed Central journal article supplement (PMC5039324; doi:10.1111/eva.12335), 2015-11-23

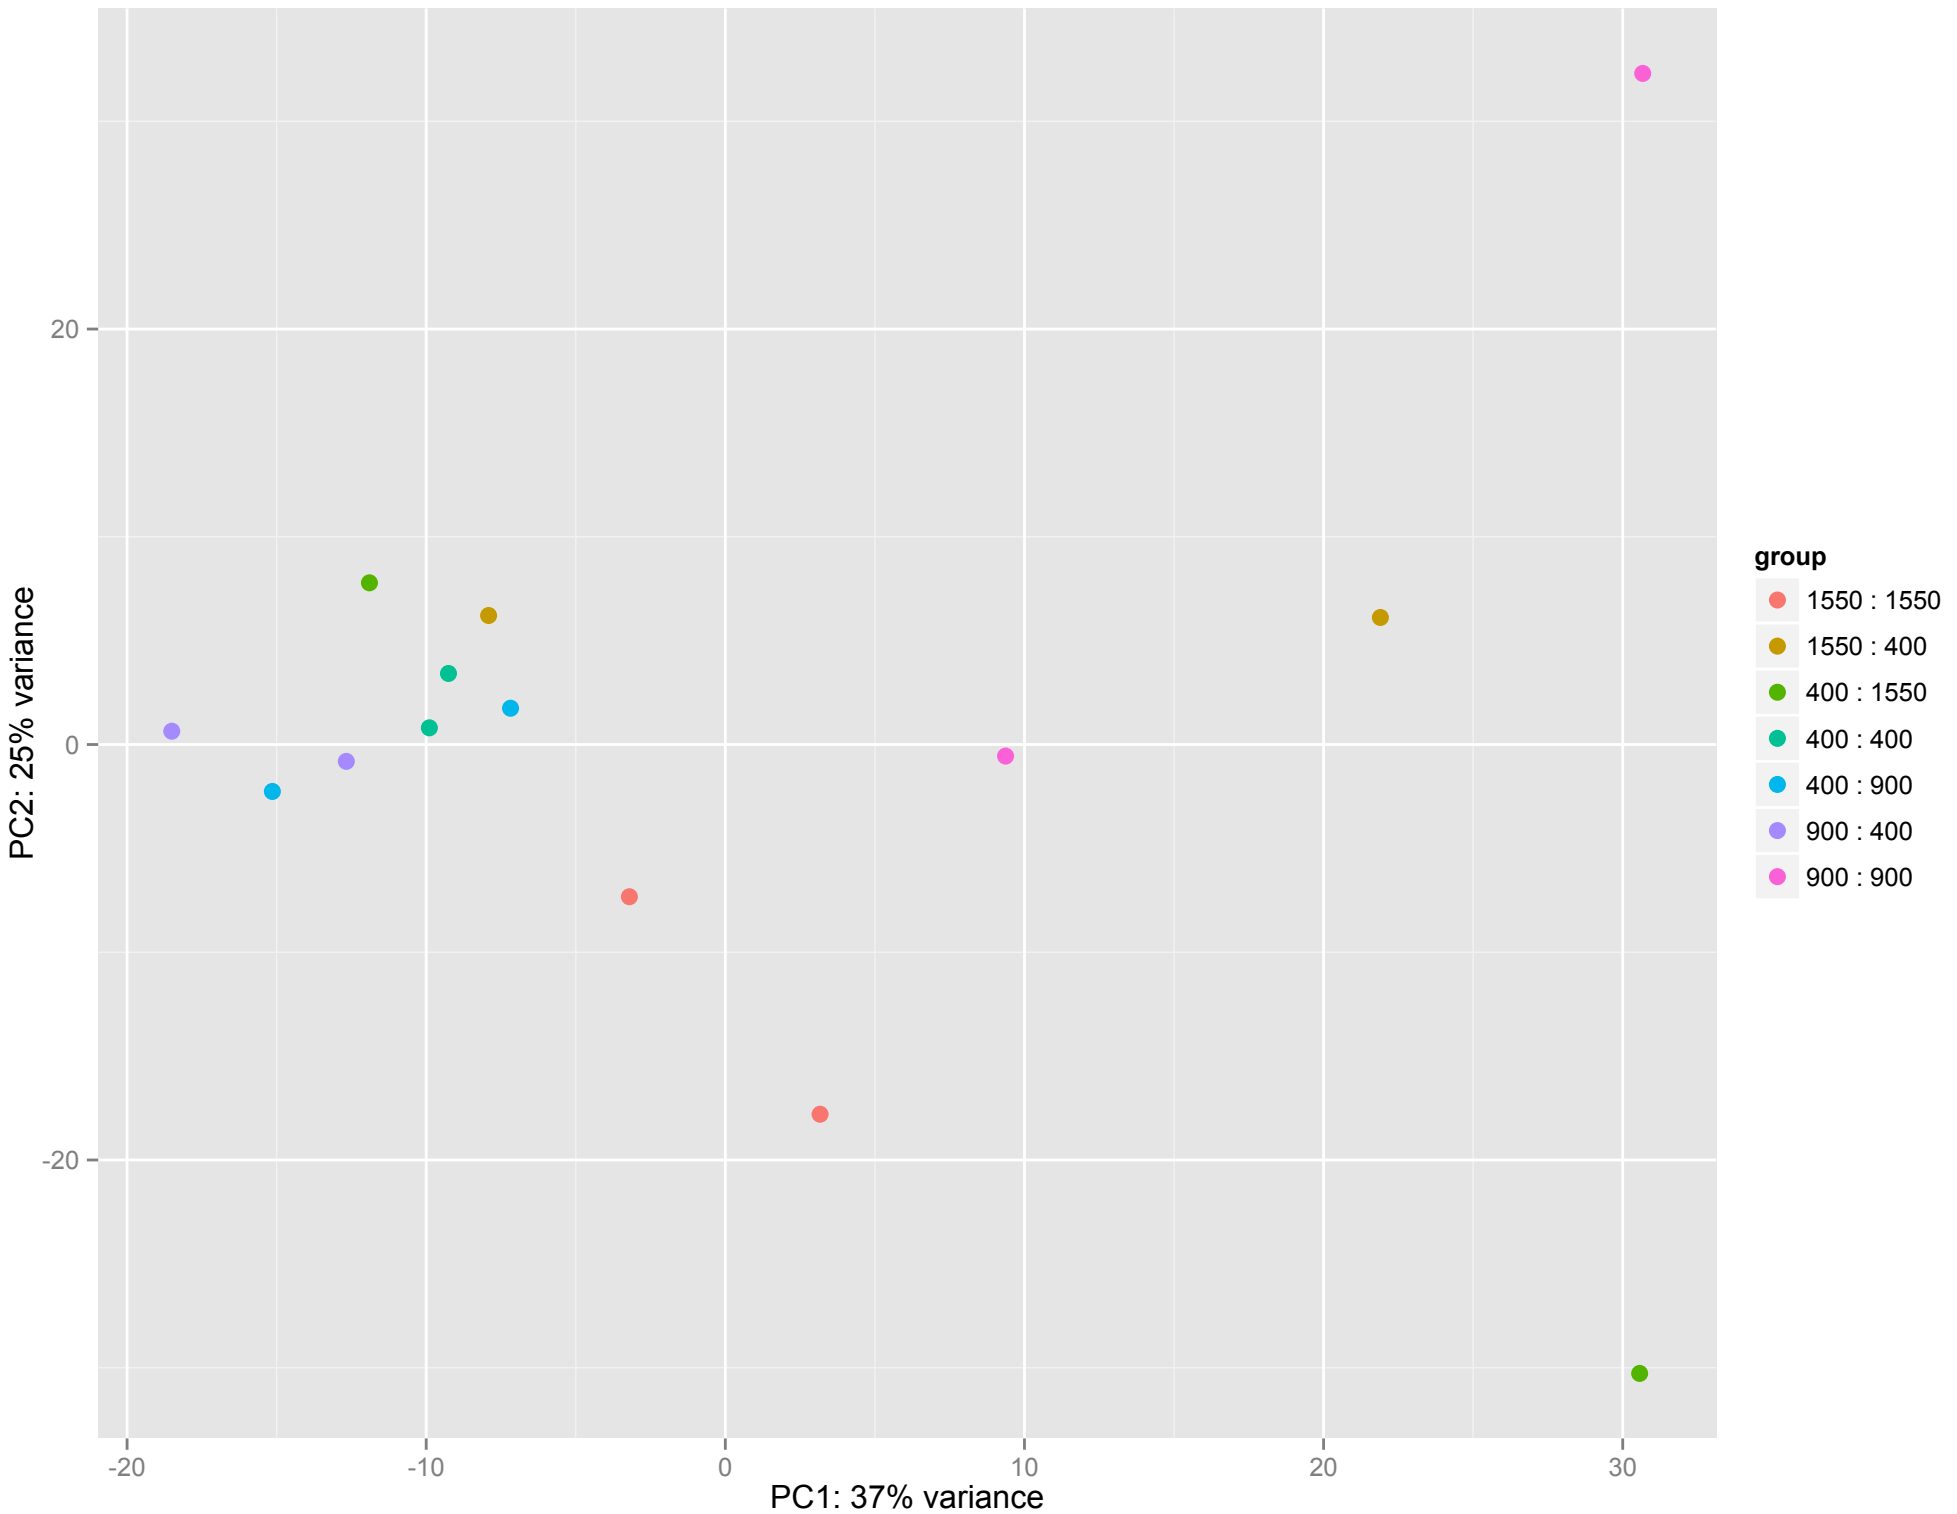

Supplement: EVA-9-1112-s007.pdf [file EVA-9-1112-s007.pdf]
